# Supplementary material
Source: Springer Nature journal article supplement (https://www.springermedizin.de/resource/supplementary/12958_2011_963_MOESM6_ESM.pdf/9566472)

hCG free  $\beta$ -subunit and hyperglycosylated hCG

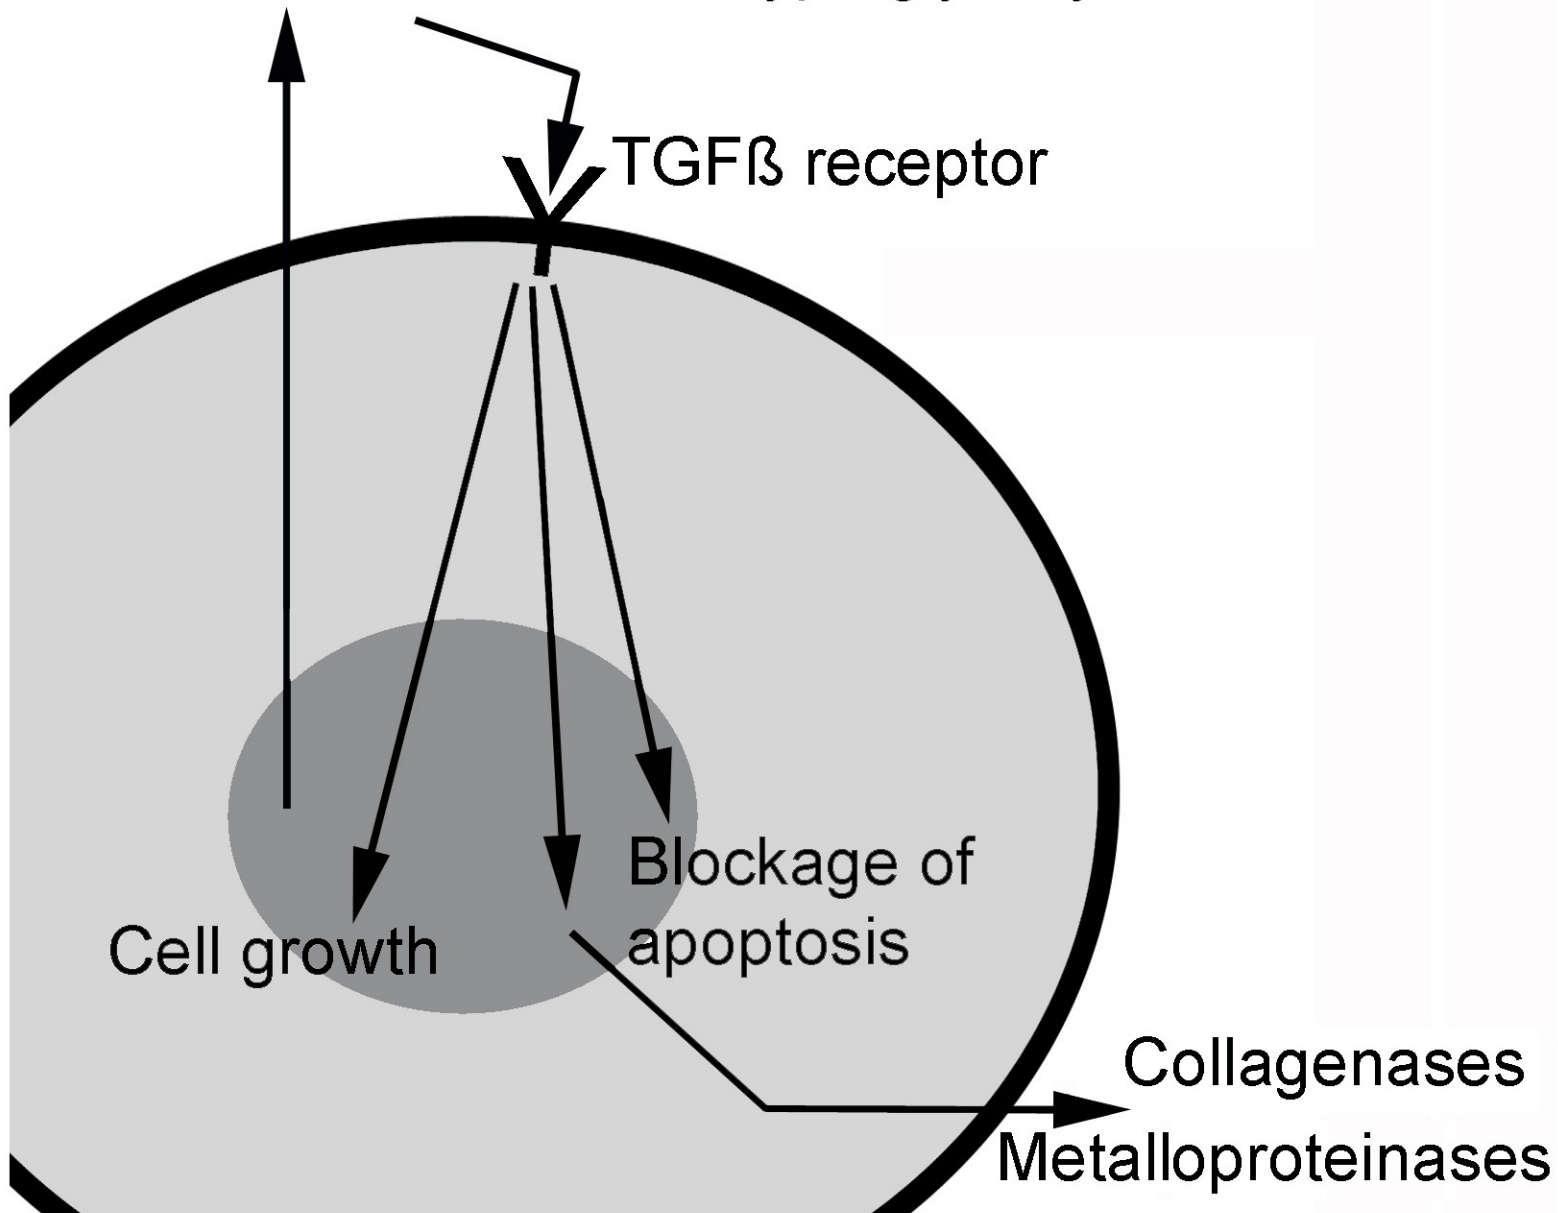

Supplement: MOESM6 [file 9566472]
